# Supplementary material for: Gut microbiota promotes enteroendocrine cell maturation and mitochondrial function
Source: PubMed Central journal article supplement — bioRxiv. 2023 Nov 5:2023.09.27.558332. Preprint. [Version 2] doi: 10.1101/2023.09.27.558332 (PMC10635018; doi:10.1101/2023.09.27.558332), 2023-11-05

## 745 **Supplemental Figure Legends**

746 **Supplemental Figure 1. The EEC subtypes in zebrafish larvae.** (A) UMAP plots of the  
747 zebrafish intestine single-cell RNA sequencing showing the zebrafish EECs and the five  
748 EEC subtypes in zebrafish larvae. The zebrafish scRNA dataset is from Wen J. et al.,  
749 2021. (B) The hormone profiles in the five zebrafish EEC subtypes. (C-E)  
750 Immunofluorescence staining of the PYY+EEC subtype. Note that the PYY+EECs are  
751 distributed in the proximal zebrafish intestine (C-C'). It overlaps with the secretory cell  
752 marker 2F11 (D) but does not overlap with the marker for other EEC subtypes, such as  
753 *trpa1b* (E). (F-K) Immunofluorescence staining of the *Trpa1*+EEC subtype. The single-  
754 cell RNA seq data above demonstrate that the *Trpa1*+EECs (EEC5) express the peptide  
755 enkephalin (ENK) and the enzyme that synthesizes serotonin (*tph1b*). (F-G)  
756 Immunofluorescence staining of ENK confirms that only *Trpa1*+EECs express ENK (G).  
757 Interestingly, ENK is only expressed in the *Trpa1*+EECs in the proximal intestine (F-F').  
758 (H) *Trpa1*+EECs do not express *sst2*, a marker for the EEC subtype 1. (I-J) *Tph1b* is  
759 expressed in the EECs. (K) Immunofluorescence staining showing part of the  
760 *Trpa1*+EECs express 5-HT.

761 **Supplemental Figure 2. Commensal microbiota colonization promotes the**  
762 **formation of “neuropod”-like structure in EECs.** (A-D') Confocal projections of the GF  
763 and CV *Tg(neurod1:lifeActin-EGFP)* zebrafish. The yellow stars in A indicate EECs with  
764 thin actin filaments at the basal lateral membrane. The White arrows in C and D indicate  
765 the “neuropod” like elongated basal lateral membrane protrusions in CV EECs. (E)  
766 Quantification of the EEC percentage that has “neuropod” like structure in GF and CV  
767 conditions. Student T-test was used in E. Each dot represents an individual zebrafish. \*  
768  $P < 0.05$ .

769 **Supplemental Figure 3. Gut microbiota did not alter the proximal intestine**  
770 **mitochondria abundance.** (A) Quantification of the intracellular mitochondria  
771 abundance in the 3dpf to 6dpf zebrafish EECs. The mitochondrial abundance is  
772 represented by the *neurod1:mitoEOS* and *neurod1:RFP* fluorescence ratio in individual  
773 EECs. Each dot represents an EEC. 4 zebrafish were analyzed. (B-C) Quantification of  
774 the intracellular mitochondria abundance in the proximal and distal intestines of the GF  
775 and CV zebrafish. The mitochondrial abundance is represented by the *neurod1:mitoEOS*  
776 and *neurod1:RFP* fluorescence ratio in individual EECs. Each dot represents an EEC.  
777 More than 7 zebrafish in GF and CV groups were quantified. One-Way Anova followed  
778 by Tukey post-test was used in A. Student T-test was used in B and C. \*\*\* P<0.001, \*\*  
779 P<0.01.

780 **Supplemental Figure 4. Nutrient stimulation prominently promotes mitochondrial**  
781 **Ca<sup>2+</sup> to arise near the basal membrane.** (A-B) Zoom in view shows two linoleic acid  
782 activated EECs in *Tg(neurod1:Gcamp6f); Tg(neurod1:mitoRGECO)* zebrafish. The  
783 cytoplasmic calcium was indicated with Gcamp6f (green fluorescence), and the  
784 mitochondrial calcium was indicated with mitoRGECO (magenta fluorescence). White  
785 arrows show activated mitochondria near the basal membrane.

786 **Supplemental Figure 5. Model figure showing gut microbiota modulate EEC**  
787 **maturation and mitochondrial function.** (A) During early development, the immature  
788 EECs exhibit low cytoplasmic Ca<sup>2+</sup> and low mitochondrial Ca<sup>2+</sup> levels. These immature  
789 EECs have active filapodial filaments at the basal lateral membrane. After the zebrafish  
790 hatched out and commensal microbiota started to colonize the zebrafish intestine, the  
791 EECs continued to develop and mature. Shortly after commensal microbiota colonization,  
792 the EECs increase both cytoplasmic and mitochondrial Ca<sup>2+</sup> significantly (“EEC  
793 awakening”). After the EEC awakening, the EECs continue to mature and lose the basal  
794 lateral filapodial filaments. Some EECs form a neuropod. The mature EECs have low  
795 cytoplasmic Ca<sup>2+</sup> but high mitochondria-to-cytoplasm Ca<sup>2+</sup> ratio. (B) Commensal  
796 microbiota promotes EEC mitochondrial respiration function and increases mitochondrial  
797 inner membrane electronic potential ( $\Delta\Psi_m$ ). When nutrient stimulants, like fatty acids,  
798 stimulate the EECs, the EEC cytoplasmic Ca<sup>2+</sup> rises. The high  $\Delta\Psi_m$  permits the  
799 cytoplasmic Ca<sup>2+</sup> to flux into the mitochondrial matrix and power mitochondrial ATP  
800 production, which then promotes EEC vesicle release.

801

## 802 **Supplemental Tables**

803 **Supplemental Table 1.** The change of transcriptomics in GF and CV EECs.

804 **Supplemental Table 2.** The zebrafish lines and primary antibodies used in this  
805 manuscript.

806

## 807 **Supplemental Videos**

808 **Supplemental Video 1.** The 3dpf enterocytes do not have active filopodia filaments. The  
809 enterocyte actin was visualized via the *Tg(gata5:lifeActin-EGFP)* zebrafish line. The actin  
810 filaments were enriched in the brush border at the apical site.

811 **Supplemental Video 2.** The active EEC filopodia filaments in 3dpf EECs. The EEC  
812 filopodia at the EEC base is visualized via the *Tg(neurod1:lifeActin-EGFP)* zebrafish line.

813 **Supplemental Video 3.** The 6dpf EECs do not display active filopodia structure at the  
814 base. The majority of the 6dpf EECs displayed enriched actin filaments at the apical brush  
815 border.

816 **Supplemental Video 4.** Use the *Tg(neurod1:Gcamp6f); Tg(neurod1:mitoRGECO)* to  
817 simultaneously image the EECs' cytoplasmic and mitochondrial calcium.

818 **Supplemental Video 5.** The dynamic of the EEC mitochondrial calcium at the resting  
819 conditions in conventionally raised zebrafish.

820 **Supplemental Video 6.** The spontaneous calcium fluctuations in conventionalized (CV)  
821 zebrafish EECs. The EEC calcium dynamics were visualized using the  
822 *Tg(neurod1:Gcamp6f)* zebrafish.

823 **Supplemental Video 7.** The reduced calcium fluctuations in germ-free zebrafish EECs.  
824 The EEC calcium dynamics were visualized using the *Tg(neurod1:Gcamp6f)* zebrafish.

825 **Supplemental Video 8.** The Linoleic acid stimulation increases EEC cytoplasmic and  
826 mitochondrial calcium in conventionally raised zebrafish. The cytoplasmic calcium was  
827 visualized via the *Tg(neurod1:Gcamp6f)* (green) and the mitochondrial calcium was  
828 visualized via the *Tg(neurod1:mitoRGECO)* (magenta).

829 **Supplemental Video 9.** The Linoleic acid stimulation increases EEC mitochondrial  
830 calcium in conventionally raised zebrafish.

A

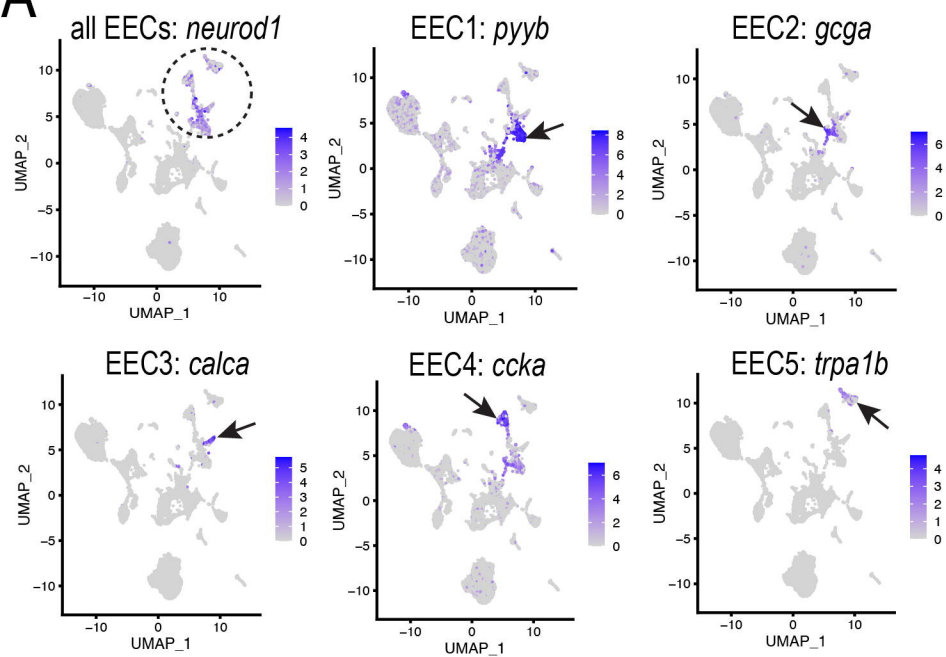

B

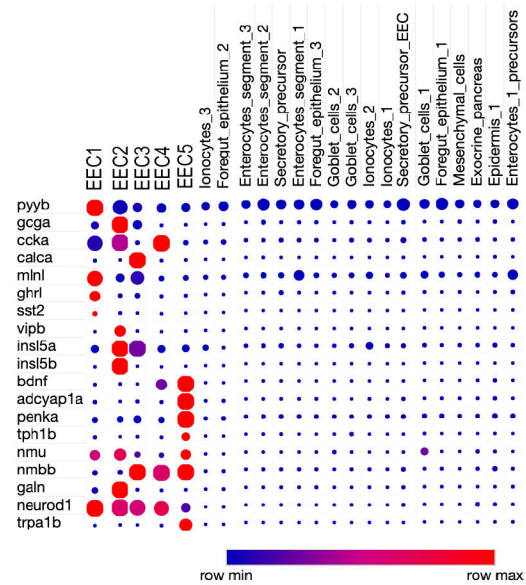

Wen J. et al., 2021

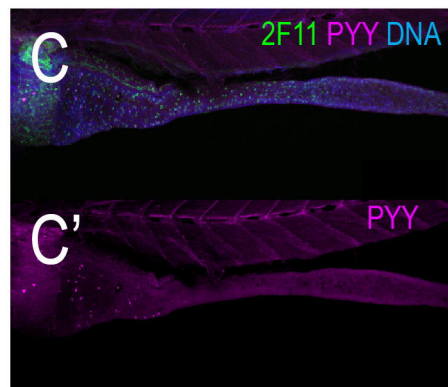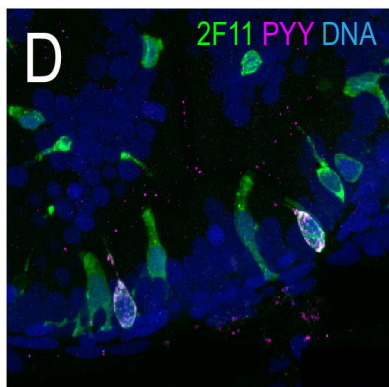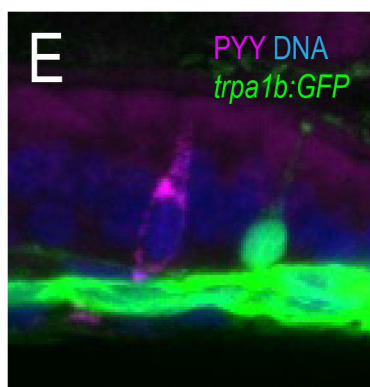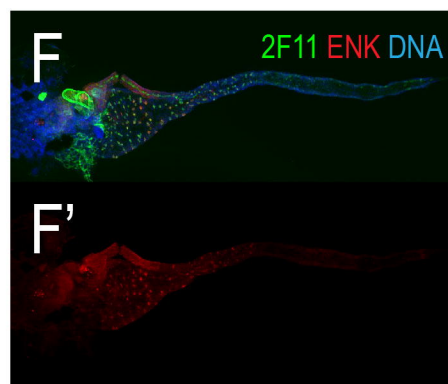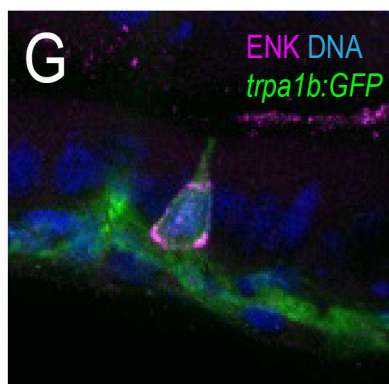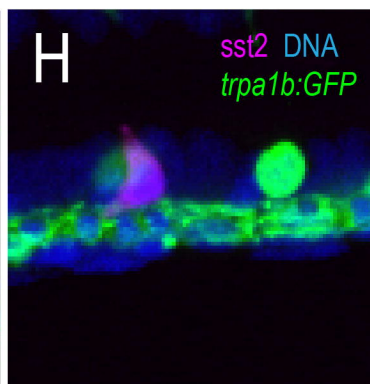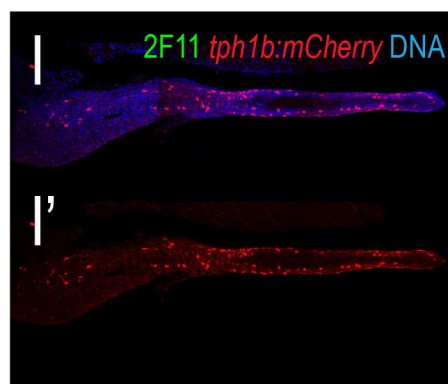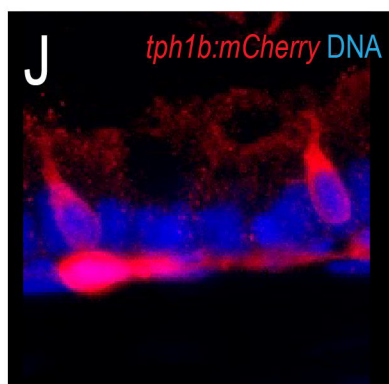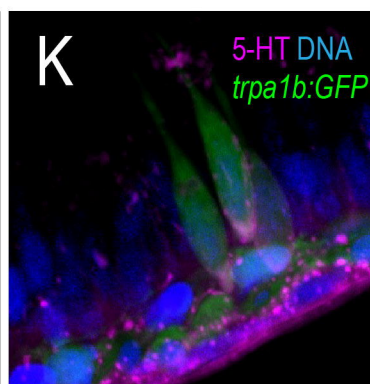



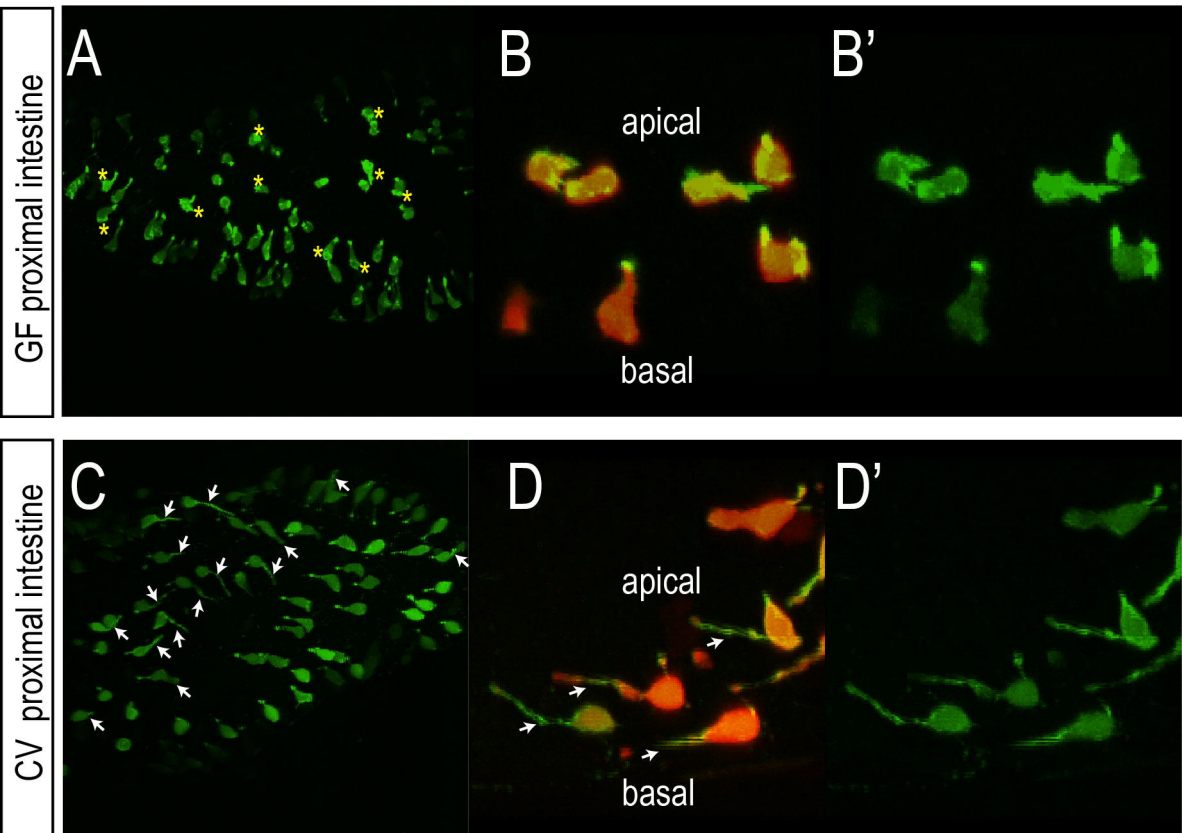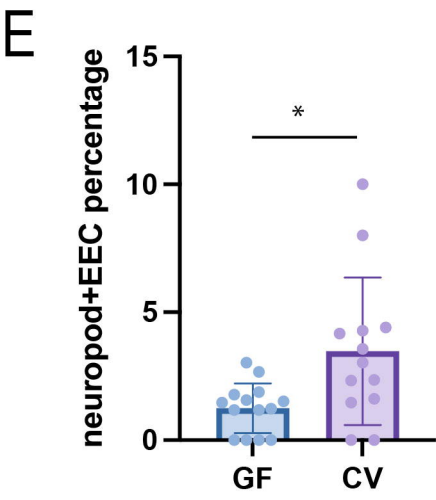

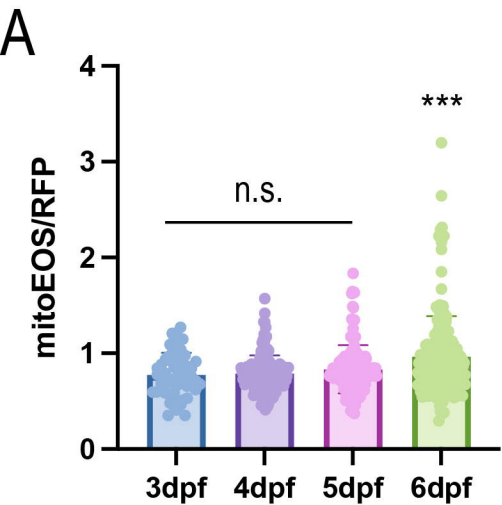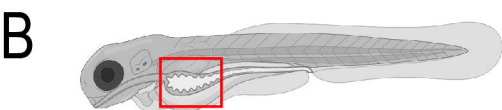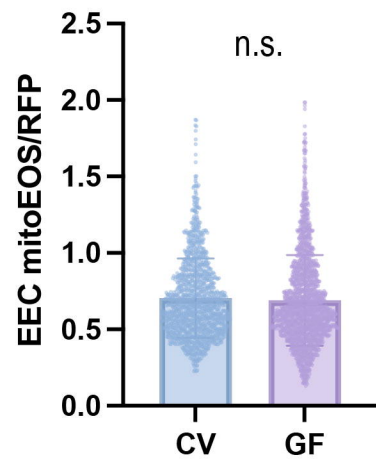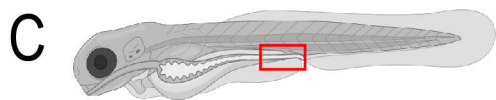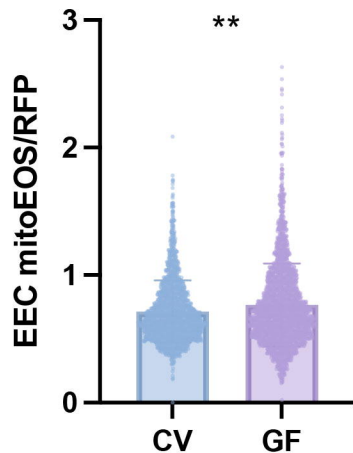

# Linoleic acid increases EEC cytoplasmic and mitochondrial calcium

**A**

*neurod1:Gcamp6f* EEC cytoplasmic calcium  
*neurod1:mitoRGECO* EEC mitochondrial calcium

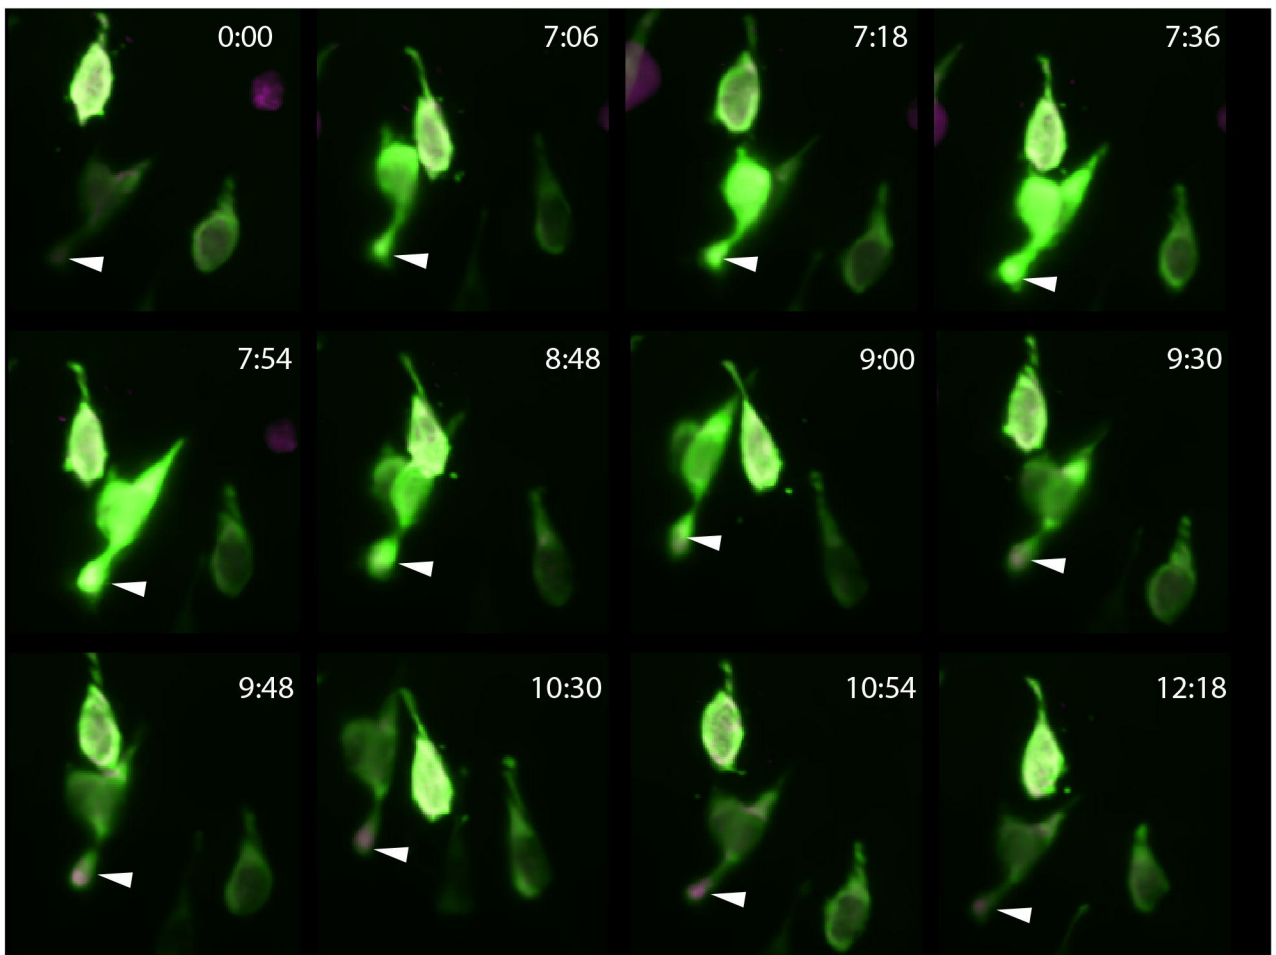

**B**

*neurod1:mitoRGECO* EEC mitochondrial calcium

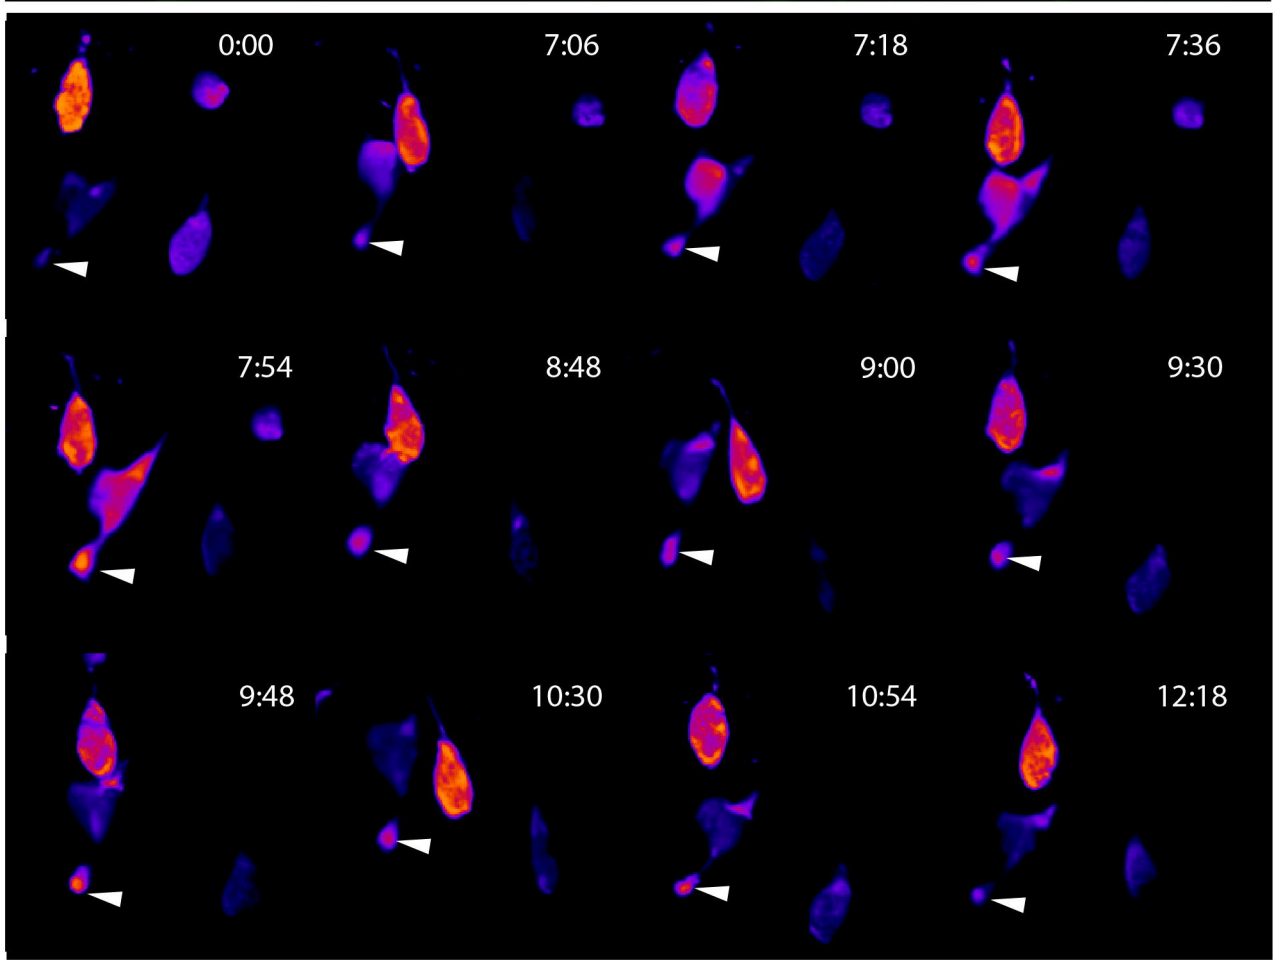

**A**

immature EECs

"EEC awakening"

EEC maturation and resetting

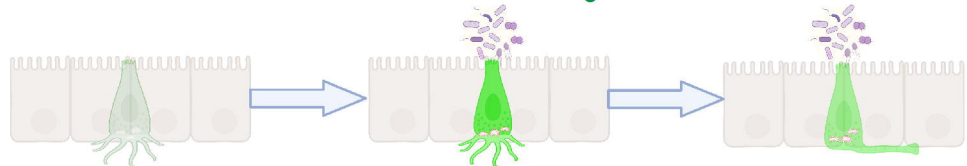

low cytoplasm  $\text{Ca}^{2+}$   
 low mitochondrial  $\text{Ca}^{2+}$   
 active basal filapodia filament

high cytoplasm  $\text{Ca}^{2+}$   
 high mitochondrial  $\text{Ca}^{2+}$

low cytoplasm  $\text{Ca}^{2+}$   
 high mitochondrial  $\text{Ca}^{2+}$   
 lose basal filapodia filament  
 some EEC form "neuropod"

mitochondria  $\text{Ca}^{2+}$  / cytoplasm  $\text{Ca}^{2+}$

**B**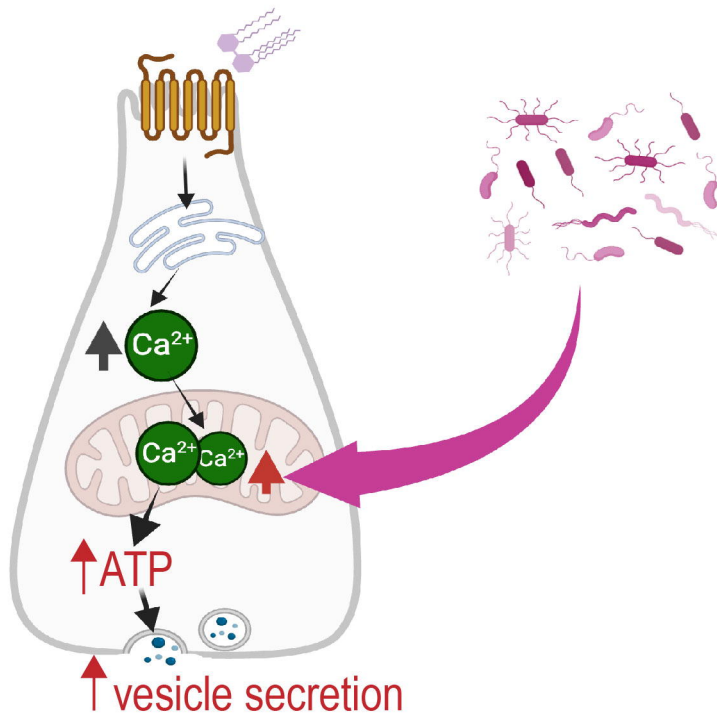

Supplement: NIHPP2023.09.27.558332V2-supplement-1.pdf [file NIHPP2023.09.27.558332V2-supplement-1.pdf]
